# Supplementary material for: The Association between the Burden of PM2.5-Related Neonatal Preterm Birth and Socio-Demographic Index from 1990 to 2019: A Global Burden Study
Source: MDPI journal article supplement (doi:10.3390/ijerph191610068), 2022-08-15
Supplement: s1 [file s1]

## Supplementary Material

### The association between the burden of PM<sub>2.5</sub>-related neonatal preterm birth and Socio-demographic index from 1990 to 2019: a global burden study

Zeyu Tang<sup>1</sup>, Jinzhu Jia<sup>1,2\*</sup>

<sup>1</sup>Department of Biostatistics, School of Public Health, Peking University, No.38, Xueyuan Road, Beijing 100871, China

<sup>2</sup>Center for Statistical Science, Peking University, 5 Summer Palace Road, Beijing 100871, China

\* Correspondence: jzjia@math.pku.edu.cn.

**Part 1 (Figures S1–S21):** Trends in the age-standardized mortality rate of PM<sub>2.5</sub>-related preterm birth in 21 regions from 1990 to 2019.

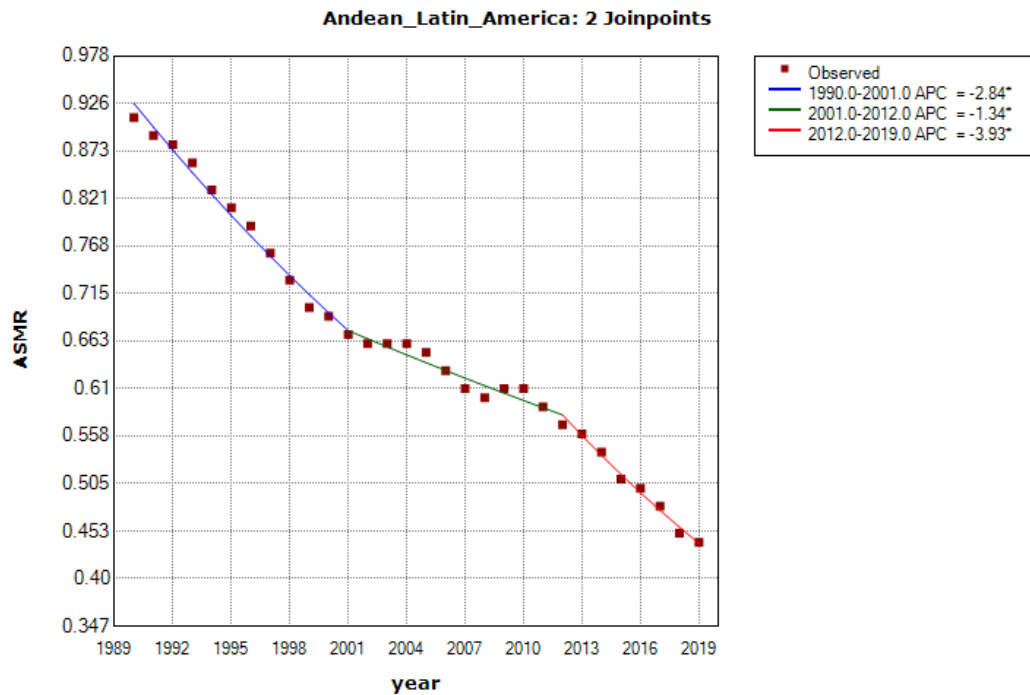

**Figure S1** Trends in the age-standardized mortality rate (ASMR, per 100,000 population) of PM<sub>2.5</sub>-related preterm birth in Andean Latin America from 1990 to 2019. \* $P < 0.05$

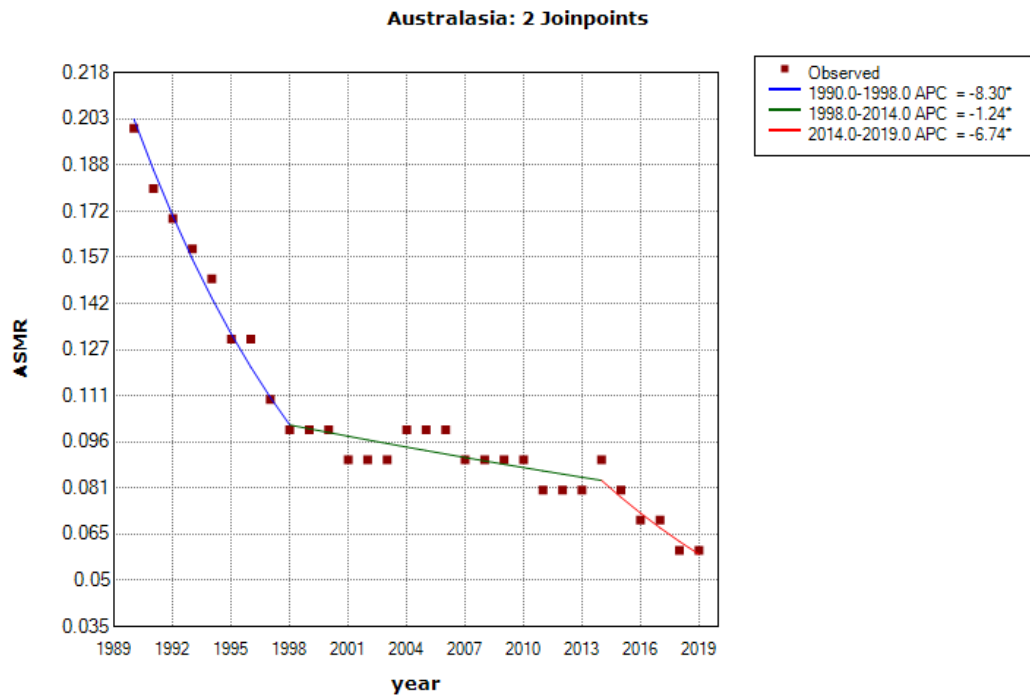

**Figure S2** Trends in the age-standardized mortality rate (ASMR, per 100,000 population) of PM<sub>2.5</sub>-related preterm birth in Australasia from 1990 to 2019. \* $P < 0.05$

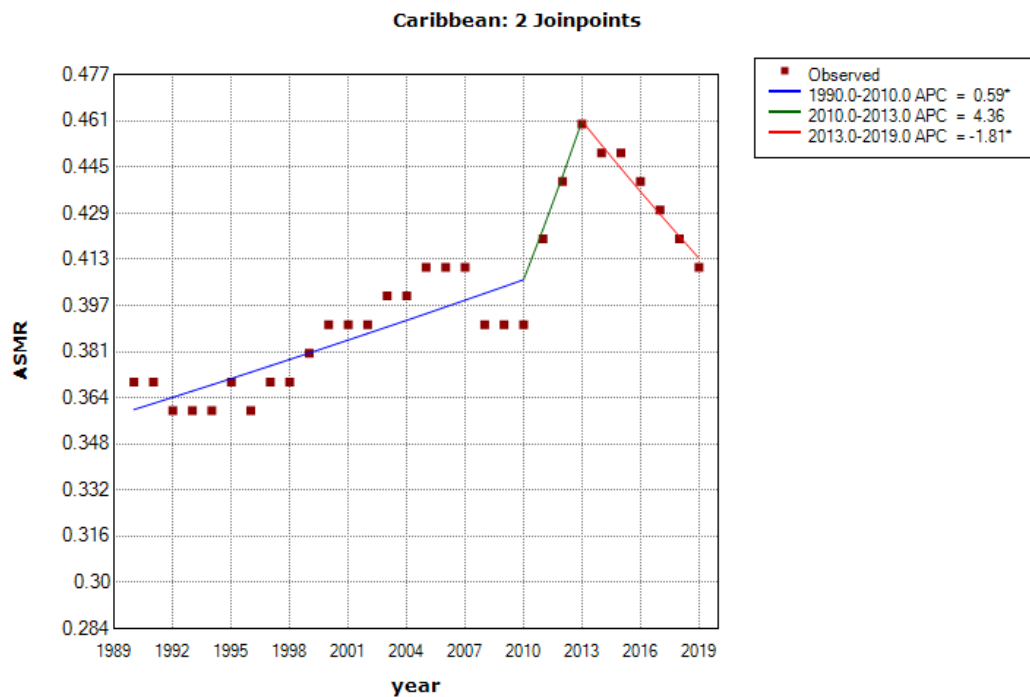

**Figure S3** Trends in the age-standardized mortality rate (ASMR, per 100,000 population) of PM<sub>2.5</sub>-related preterm birth in Caribbean from 1990 to 2019. \* $P < 0.05$

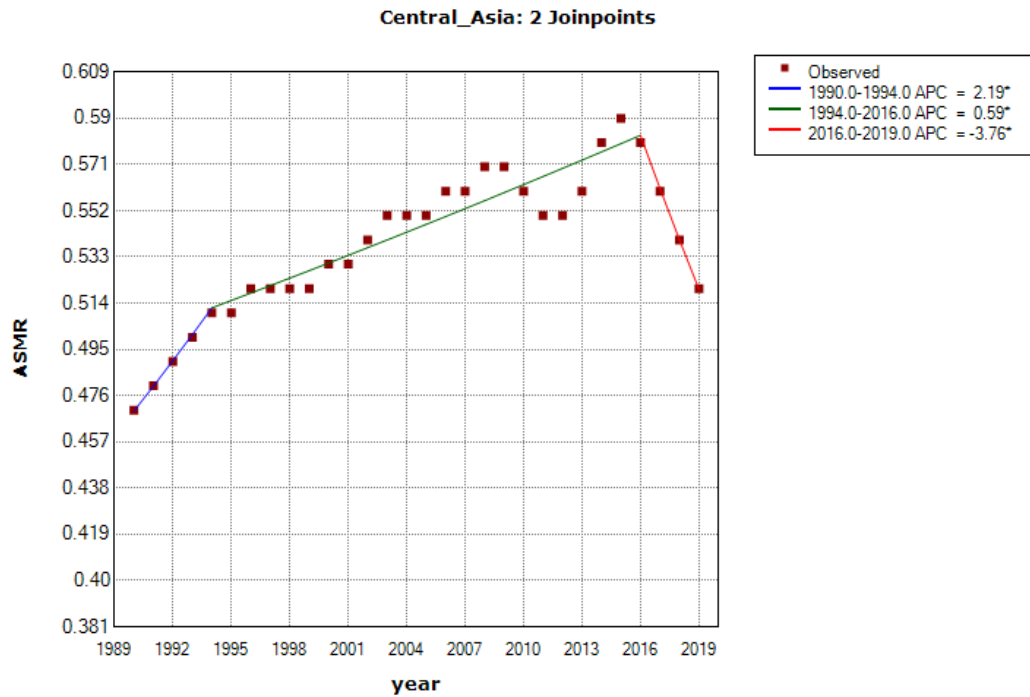

**Figure S4** Trends in the age-standardized mortality rate (ASMR, per 100,000 population) of PM<sub>2.5</sub>-related preterm birth in Central Asia from 1990 to 2019. \* $P < 0.05$

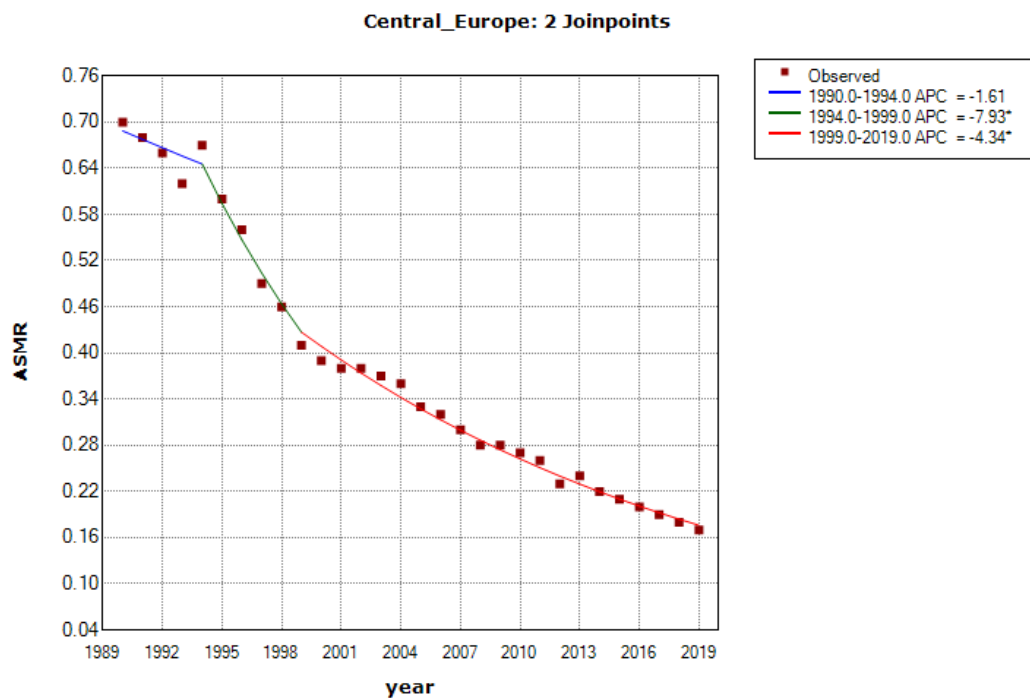

**Figure S5** Trends in the age-standardized mortality rate (ASMR, per 100,000 population) of PM<sub>2.5</sub>-related preterm birth in Central Europe from 1990 to 2019. \* $P < 0.05$

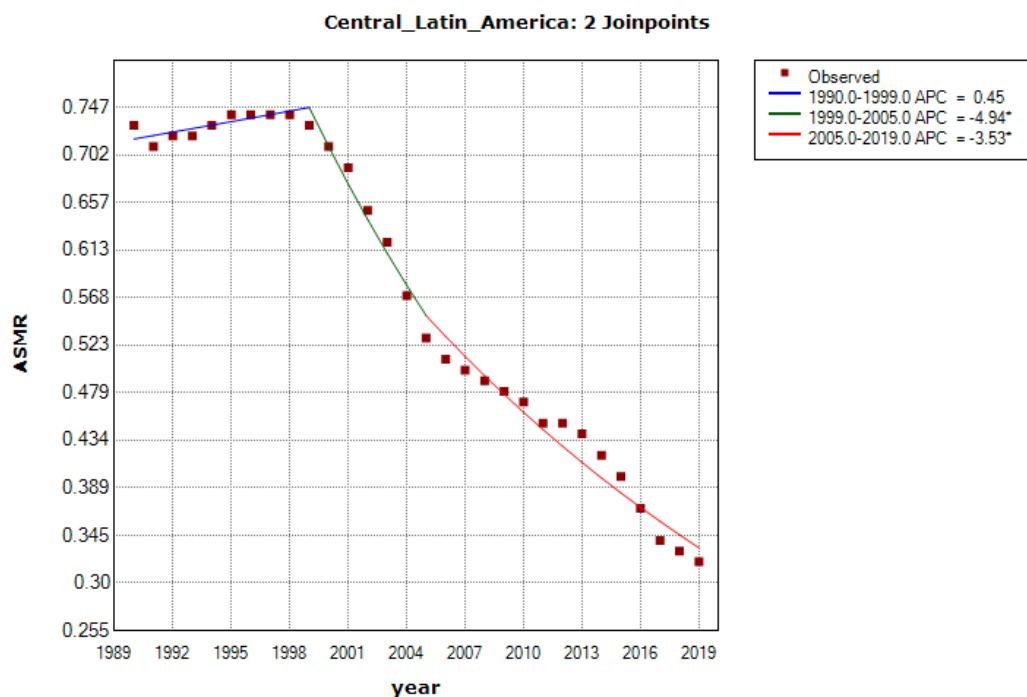

**Figure S6** Trends in the age-standardized mortality rate (ASMR, per 100,000 population) of PM<sub>2.5</sub>-related preterm birth in Central Latin America from 1990 to 2019. \* $P < 0.05$

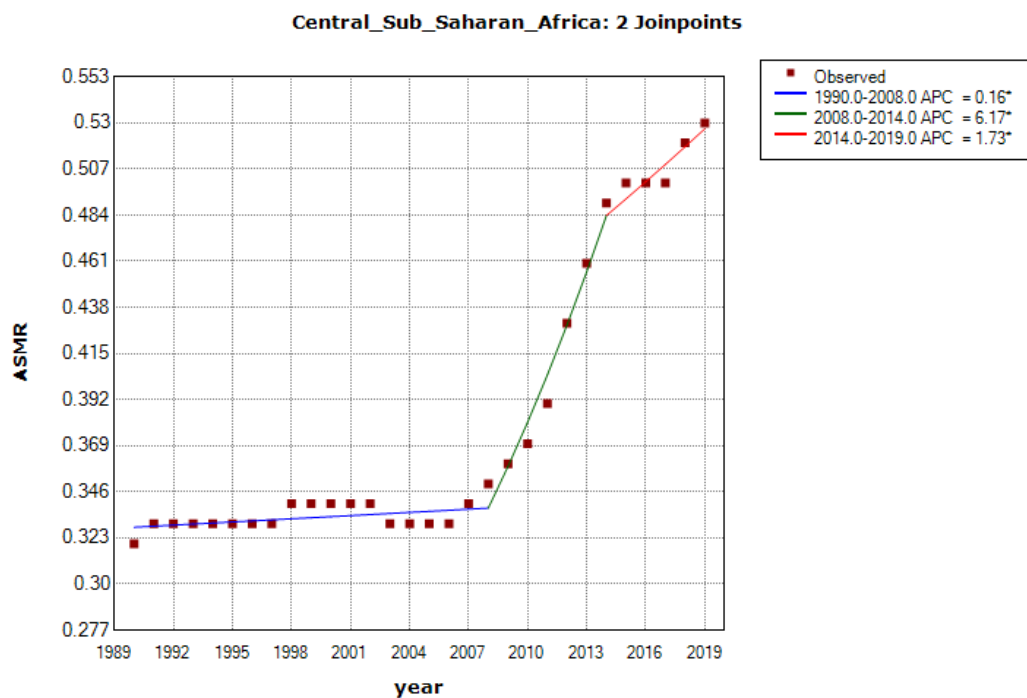

**Figure S7** Trends in the age-standardized mortality rate (ASMR, per 100,000 population) of PM<sub>2.5</sub>-related preterm birth in Central Sub Saharan Africa from 1990 to 2019. \* $P < 0.05$

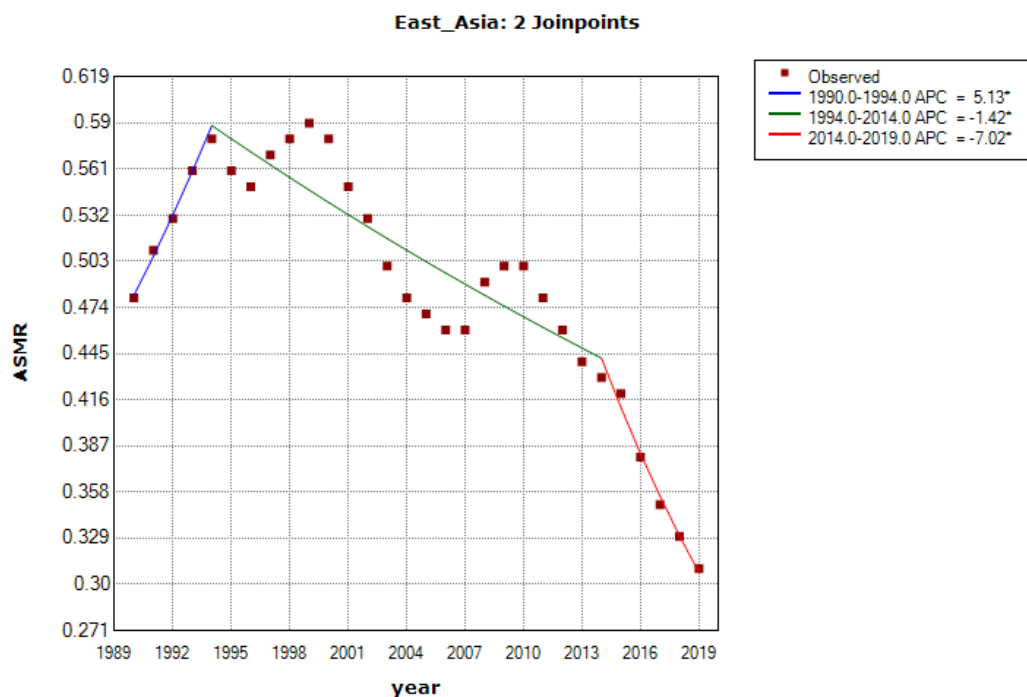

**Figure S8** Trends in the age-standardized mortality rate (ASMR, per 100,000 population) of PM<sub>2.5</sub>-related preterm birth in East Asia from 1990 to 2019. \* $P < 0.05$

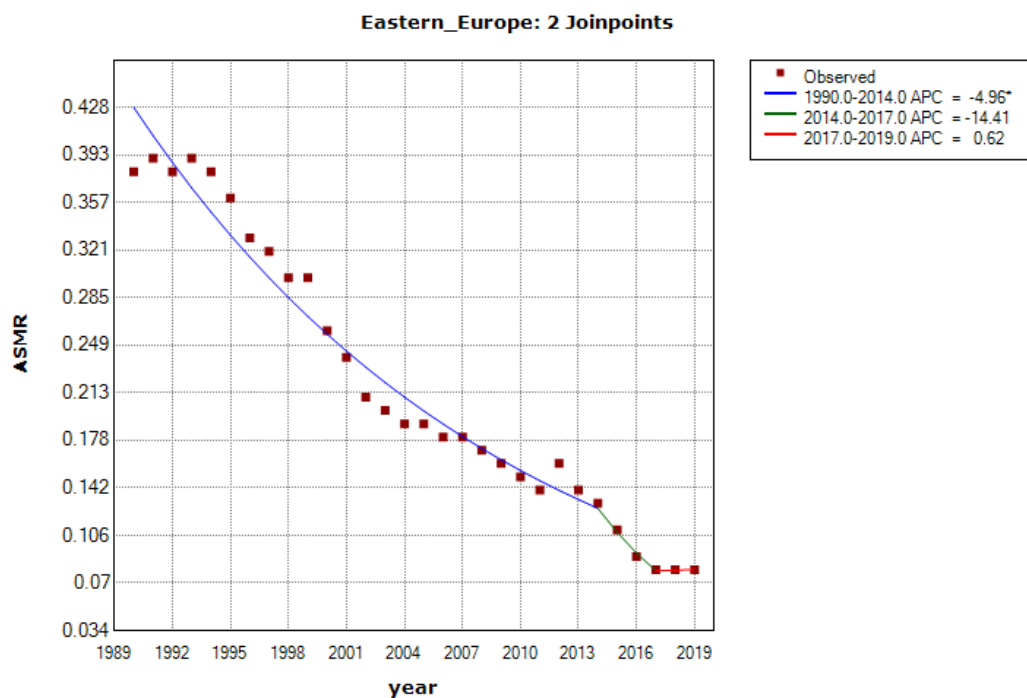

**Figure S9** Trends in the age-standardized mortality rate (ASMR, per 100,000 population) of PM<sub>2.5</sub>-related preterm birth in Eastern Europe from 1990 to 2019. \* $P < 0.05$

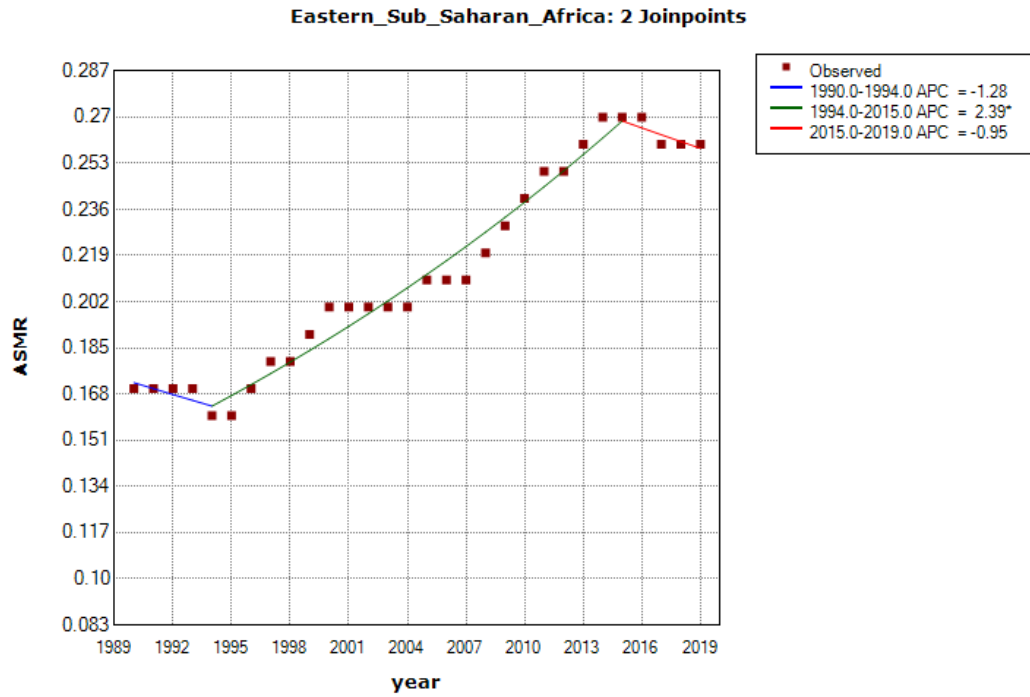

**Figure S10** Trends in the age-standardized mortality rate (ASMR, per 100,000 population) of PM<sub>2.5</sub>-related preterm birth in Eastern Sub Saharan Africa from 1990 to 2019. \* $P < 0.05$

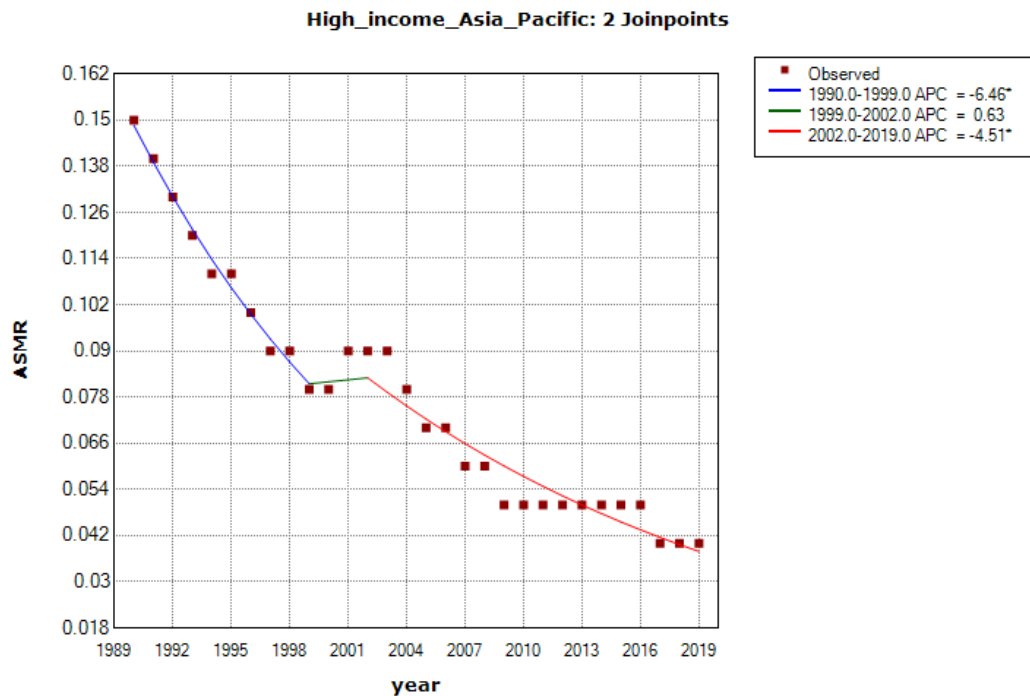

**Figure S11** Trends in the age-standardized mortality rate (ASMR, per 100,000 population) of PM<sub>2.5</sub>-related preterm birth in High income Asia Pacific from 1990 to 2019. \* $P < 0.05$

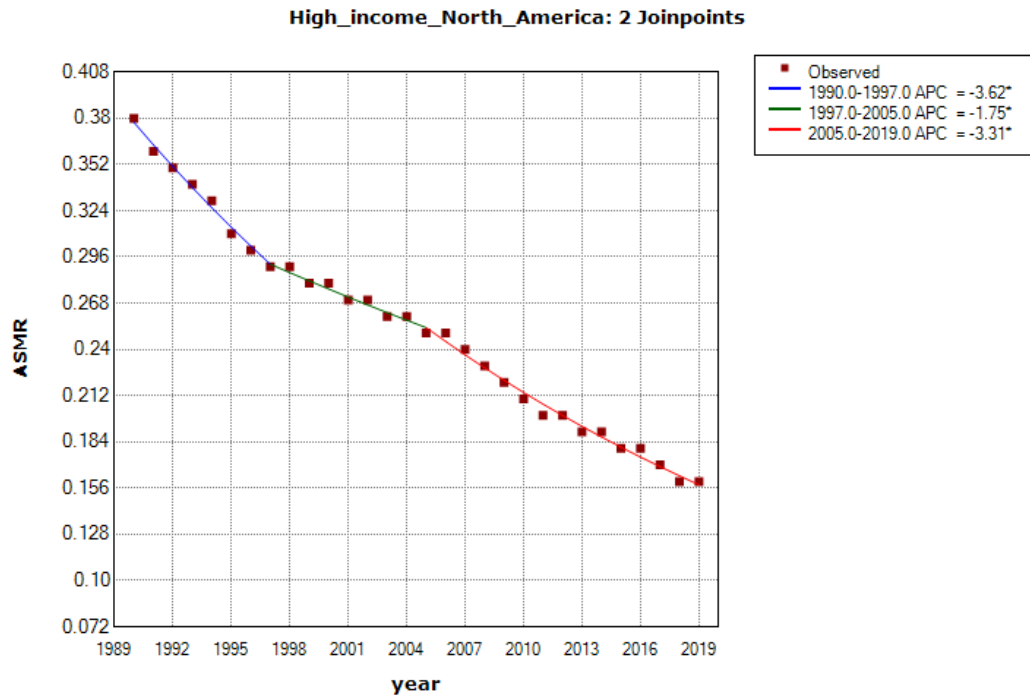

**Figure S12** Trends in the age-standardized mortality rate (ASMR, per 100,000 population) of PM<sub>2.5</sub>-related preterm birth in High income North America from 1990 to 2019. \* $P < 0.05$

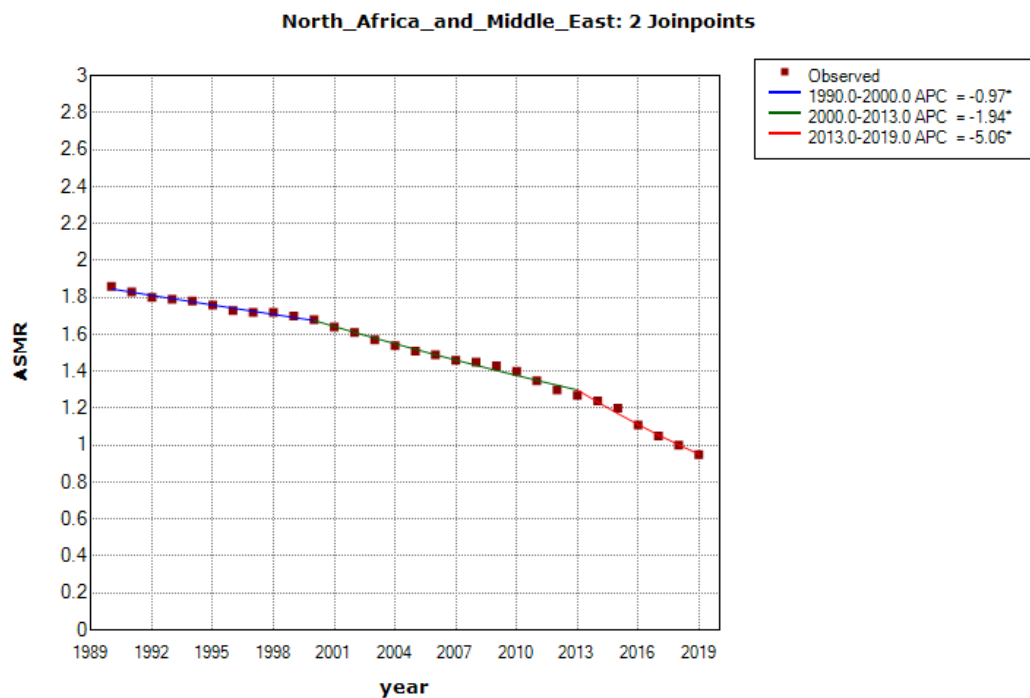

**Figure S13** Trends in the age-standardized mortality rate (ASMR, per 100,000 population) of PM<sub>2.5</sub>-related preterm birth in North Africa and Middle East from 1990 to 2019. \* $P < 0.05$

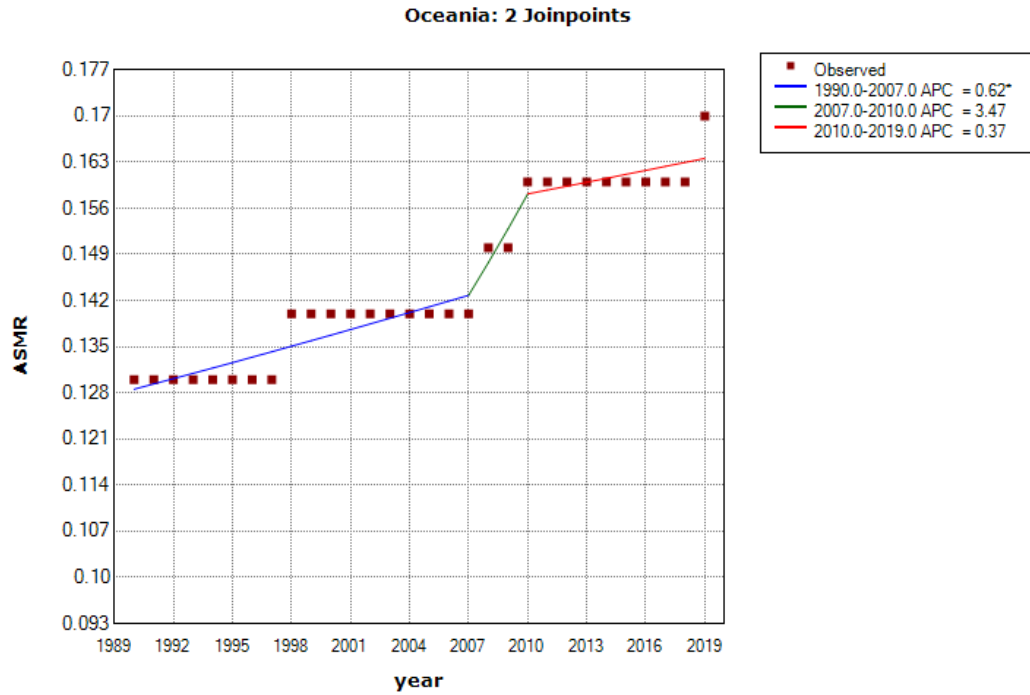

**Figure S14** Trends in the age-standardized mortality rate (ASMR, per 100,000 population) of PM<sub>2.5</sub>-related preterm birth in Oceania from 1990 to 2019. \* $P < 0.05$

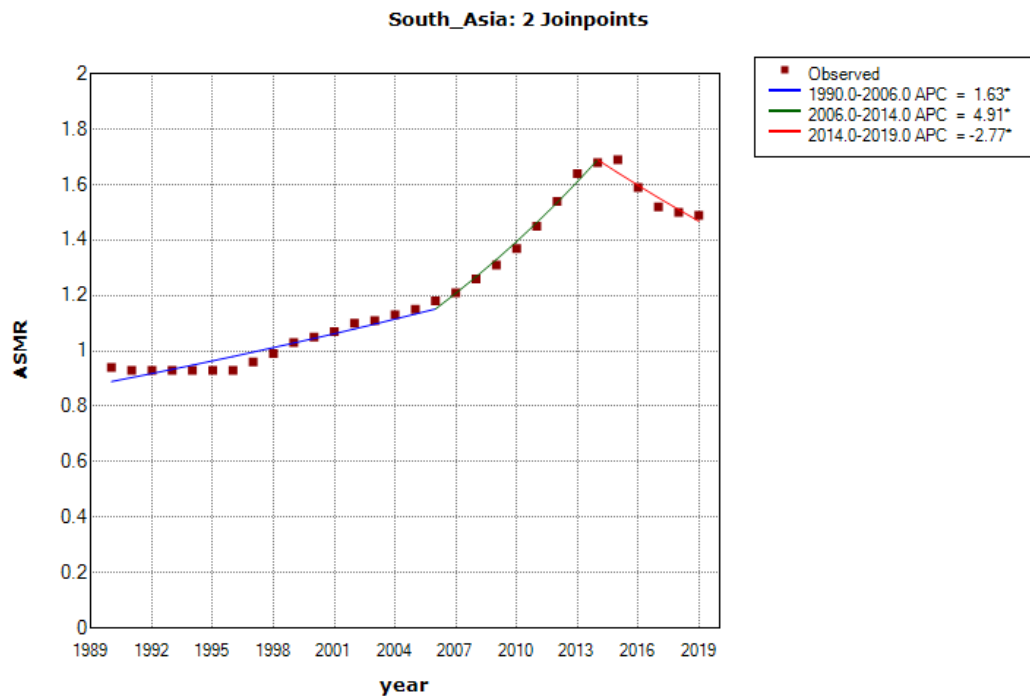

**Figure S15** Trends in the age-standardized mortality rate (ASMR, per 100,000 population) of PM<sub>2.5</sub>-related preterm birth in South Asia from 1990 to 2019. \* $P < 0.05$



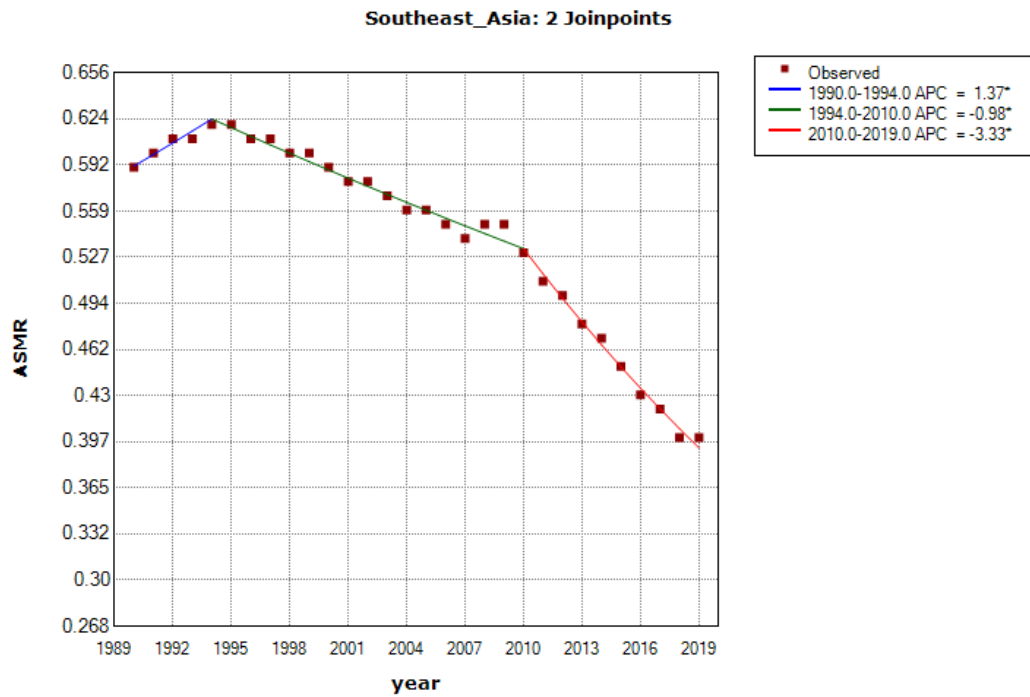

**Figure S16** Trends in the age-standardized mortality rate (ASMR, per 100,000 population) of PM<sub>2.5</sub>-related preterm birth in Southeast Asia from 1990 to 2019. \* $P < 0.05$

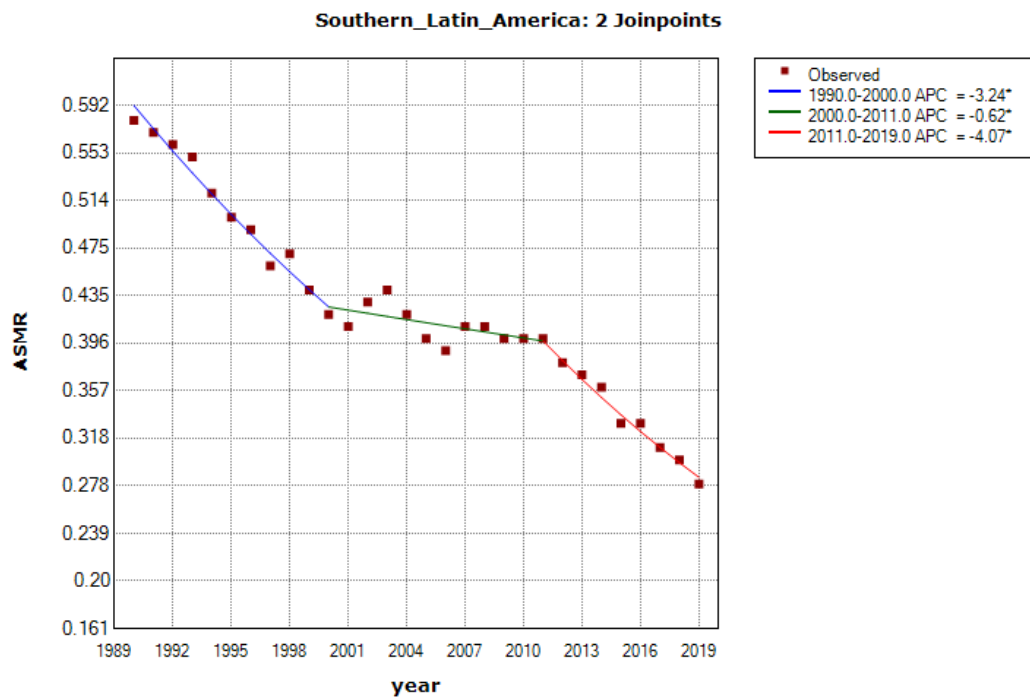

**Figure S17** Trends in the age-standardized mortality rate (ASMR, per 100,000 population) of PM<sub>2.5</sub>-related preterm birth in Southern Latin America from 1990 to 2019. \* $P < 0.05$

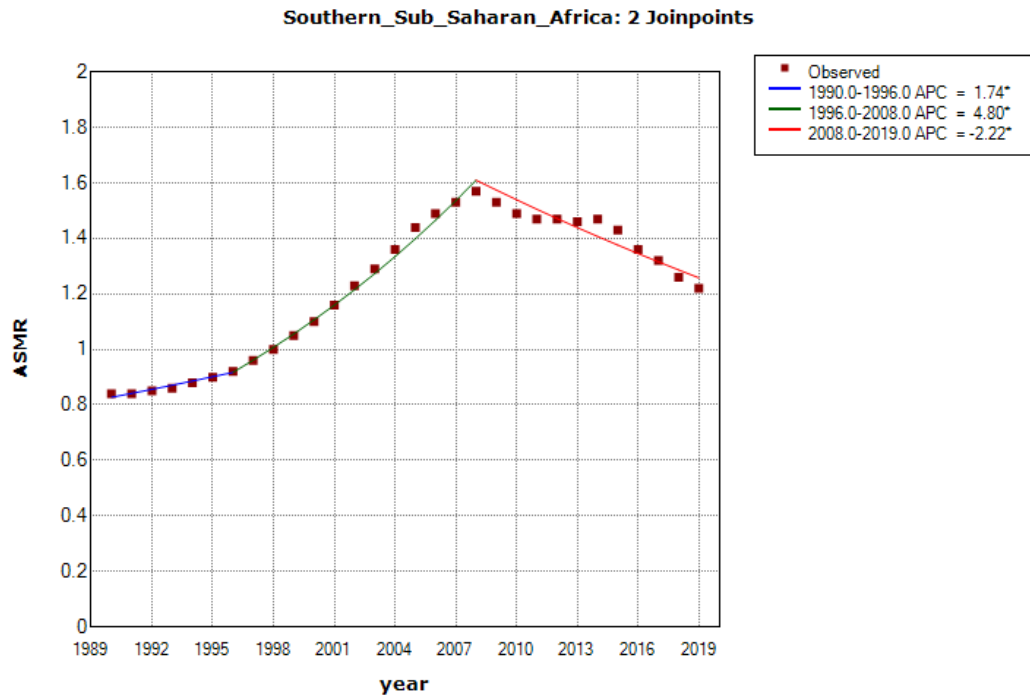

**Figure S18** Trends in the age-standardized mortality rate (ASMR, per 100,000 population) of PM<sub>2.5</sub>-related preterm birth in Southern Sub Saharan Africa from 1990 to 2019. \* $P < 0.05$

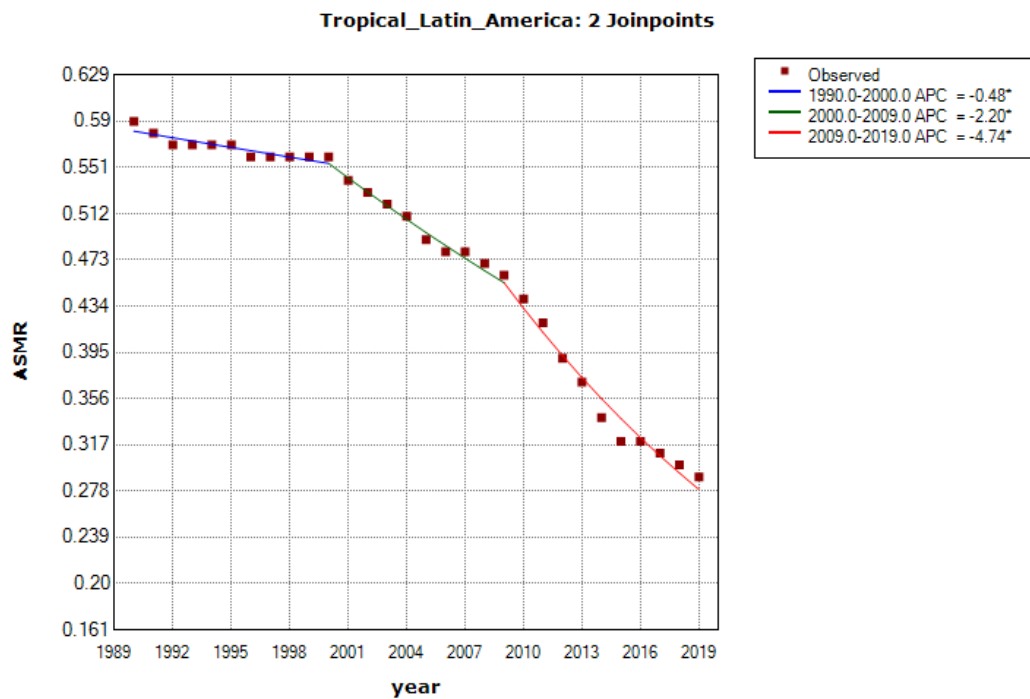

**Figure S19** Trends in the age-standardized mortality rate (ASMR, per 100,000 population) of PM<sub>2.5</sub>-related preterm birth in Tropical Latin America from 1990 to 2019. \* $P < 0.05$

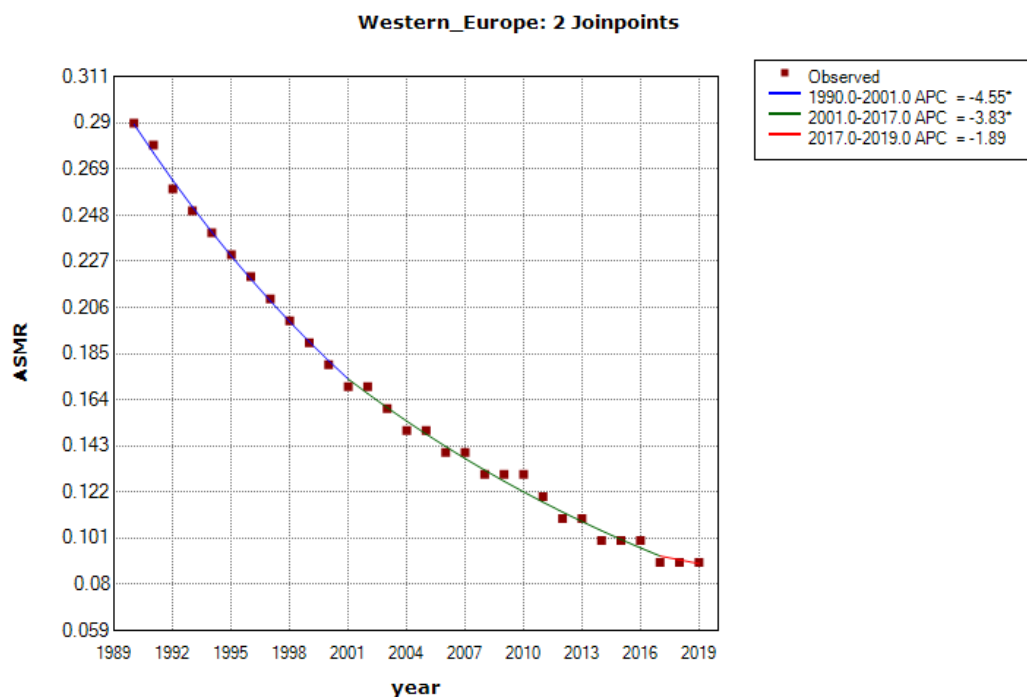

**Figure S20** Trends in the age-standardized mortality rate (ASMR, per 100,000 population) of PM<sub>2.5</sub>-related preterm birth in Western Europe from 1990 to 2019. \* $P < 0.05$

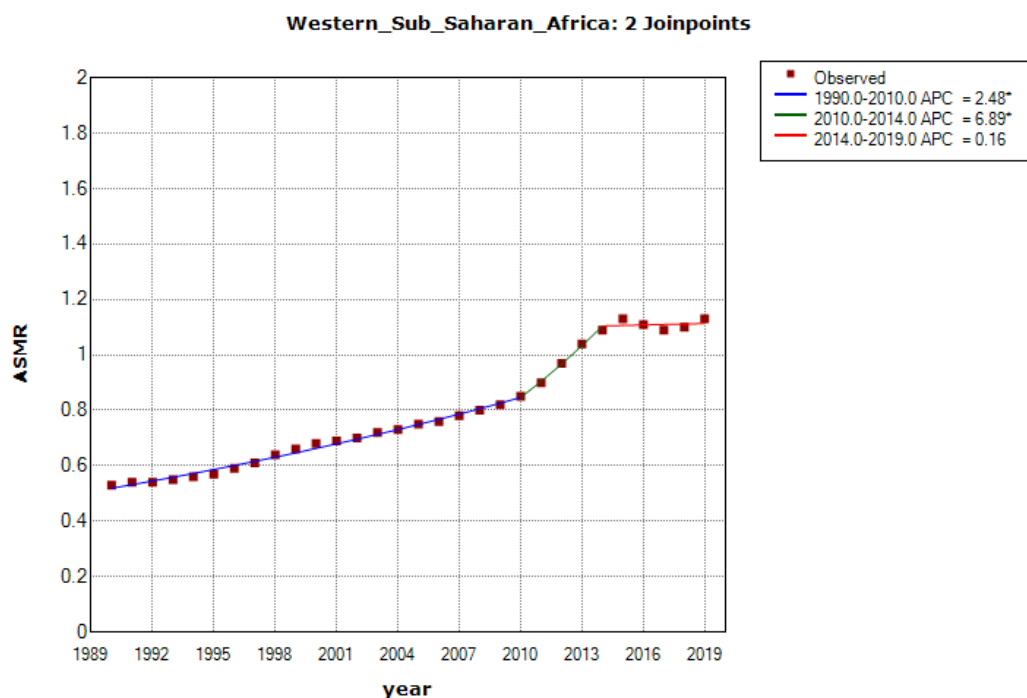

**Figure S21** Trends in the age-standardized mortality rate (ASMR, per 100,000 population) of PM<sub>2.5</sub>-related preterm birth in Western Sub Saharan Africa from 1990 to 2019. \* $P < 0.05$

**Part 2 (Fig.S22-S42):** Trends in the age-standardized disability-adjusted life rate of PM<sub>2.5</sub>-related preterm birth in 21 regions from 1990 to 2019.

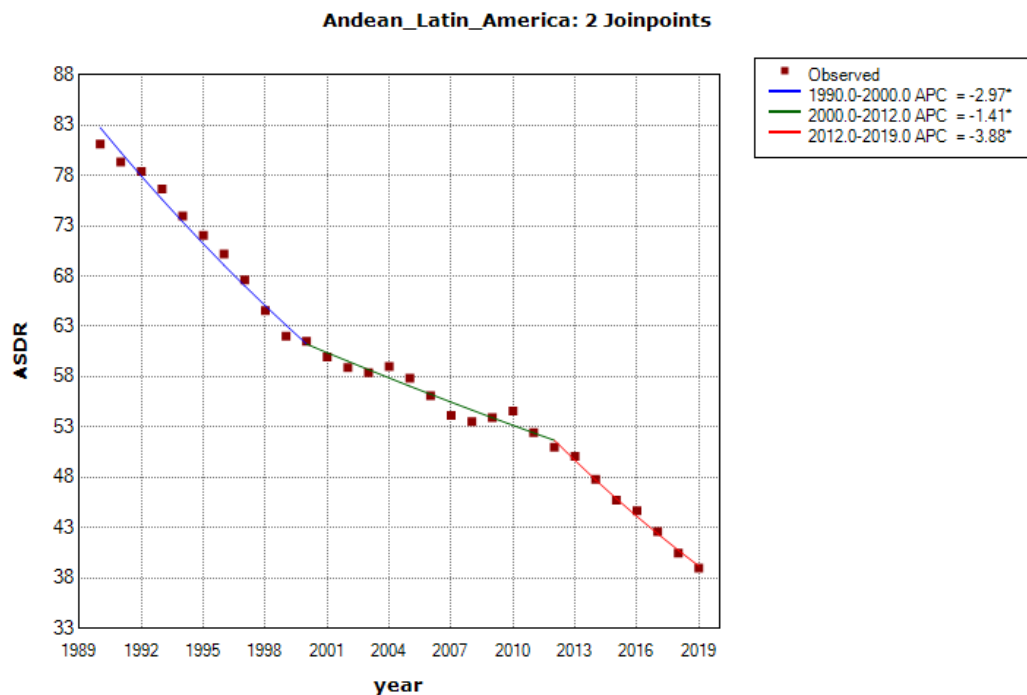

**Figure S22** Trends in the age-standardized disability-adjusted life rate (ASDR, per 100,000 population) of PM<sub>2.5</sub>-related preterm birth in Andean Latin America from 1990 to 2019. \* $P < 0.05$

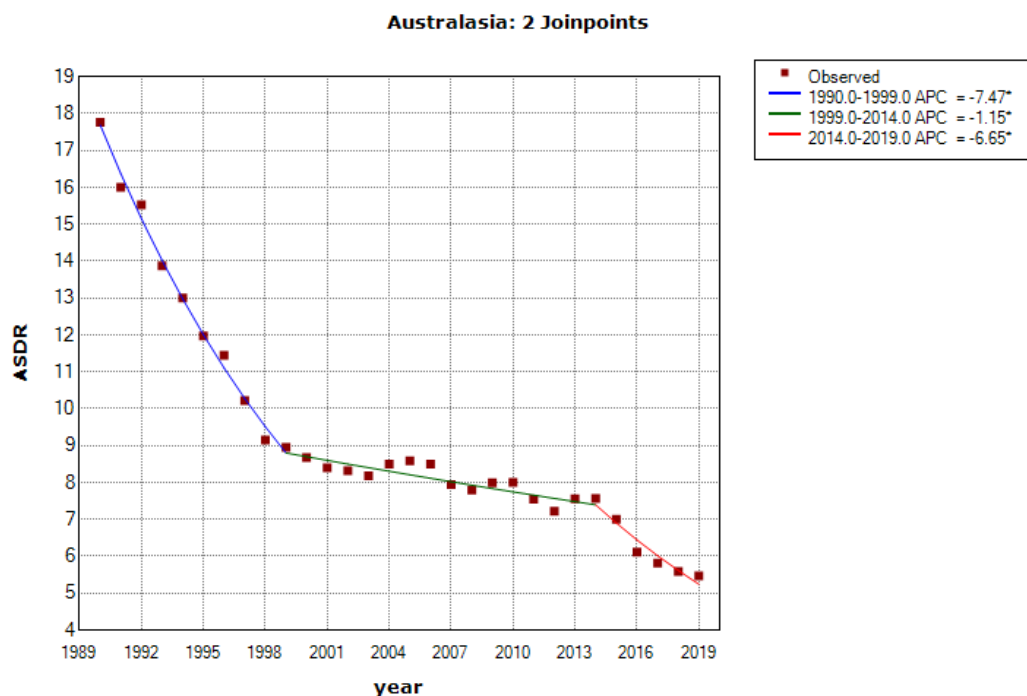

**Figure S23** Trends in the age-standardized disability-adjusted life rate (ASDR, per 100,000 population) of PM<sub>2.5</sub>-related preterm birth in Australasia from 1990 to 2019. \* $P < 0.05$

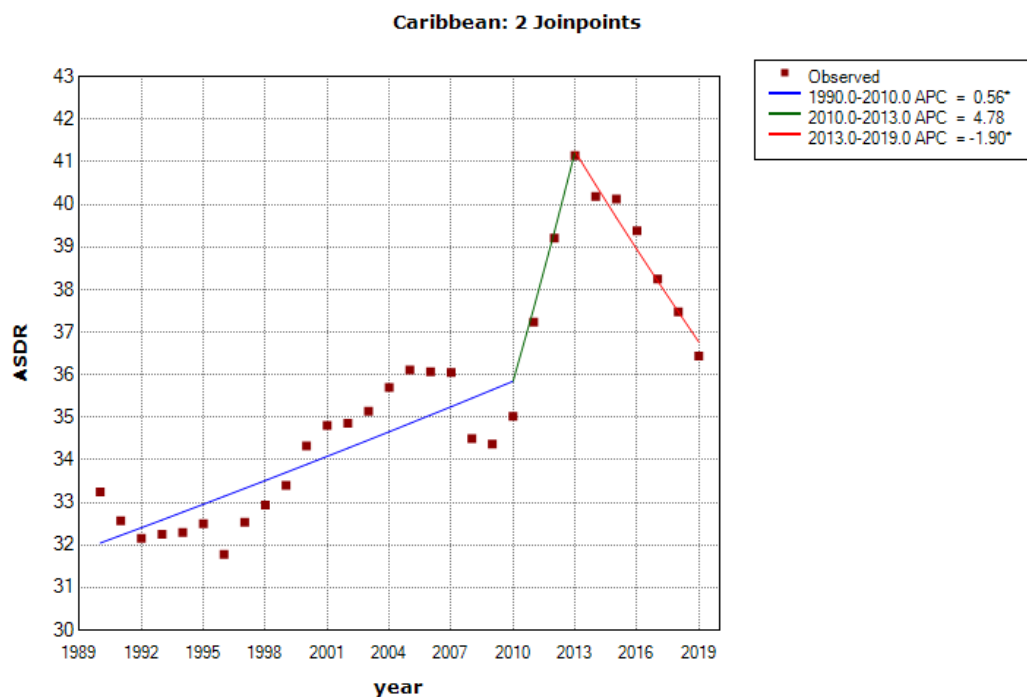

**Figure S24** Trends in the age-standardized disability-adjusted life rate (ASDR, per 100,000 population) of PM<sub>2.5</sub>-related preterm birth in Caribbean from 1990 to 2019. \* $P < 0.05$

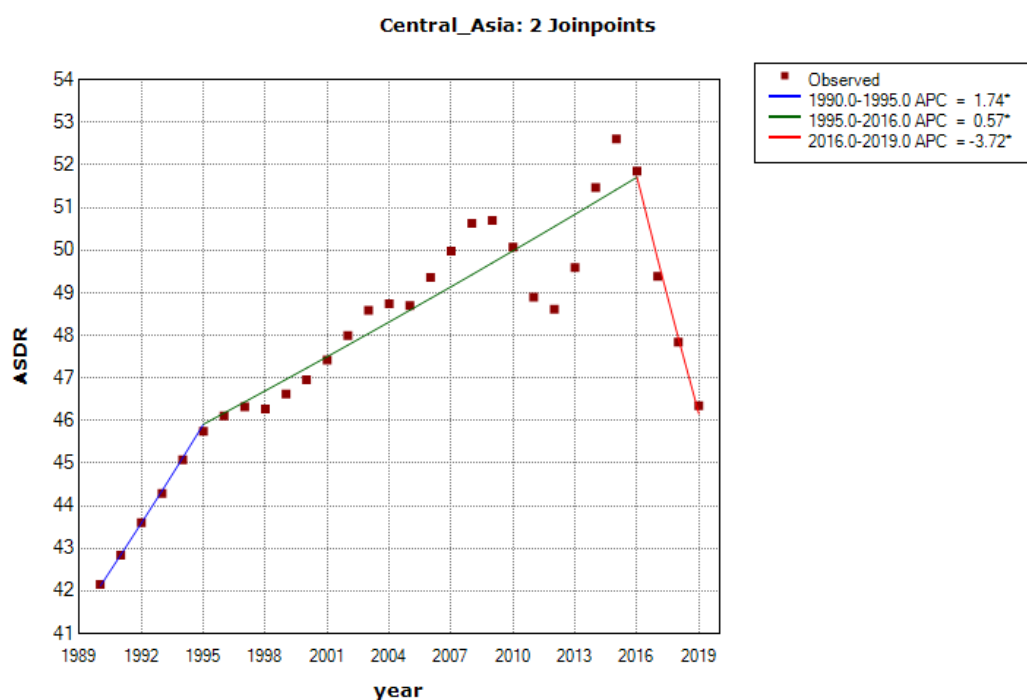

**Figure S25** Trends in the age-standardized disability-adjusted life rate (ASDR, per 100,000 population) of PM<sub>2.5</sub>-related preterm birth in Central Asia from 1990 to 2019. \* $P < 0.05$

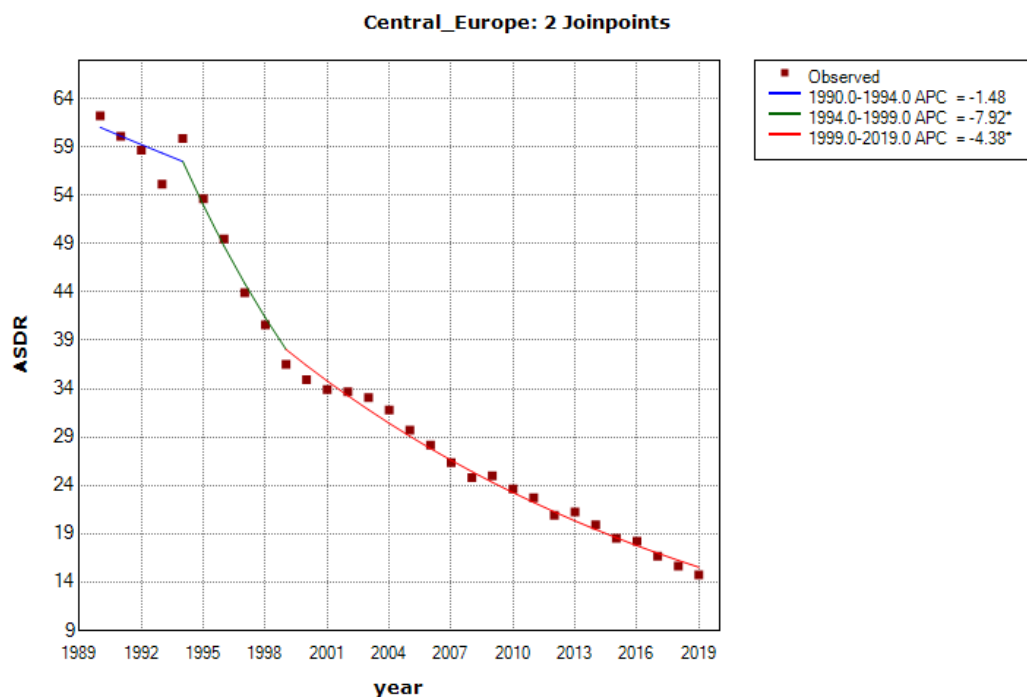

**Figure S26** Trends in the age-standardized disability-adjusted life rate (ASDR, per 100,000 population) of PM<sub>2.5</sub>-related preterm birth in Central Europe from 1990 to 2019. \* $P < 0.05$

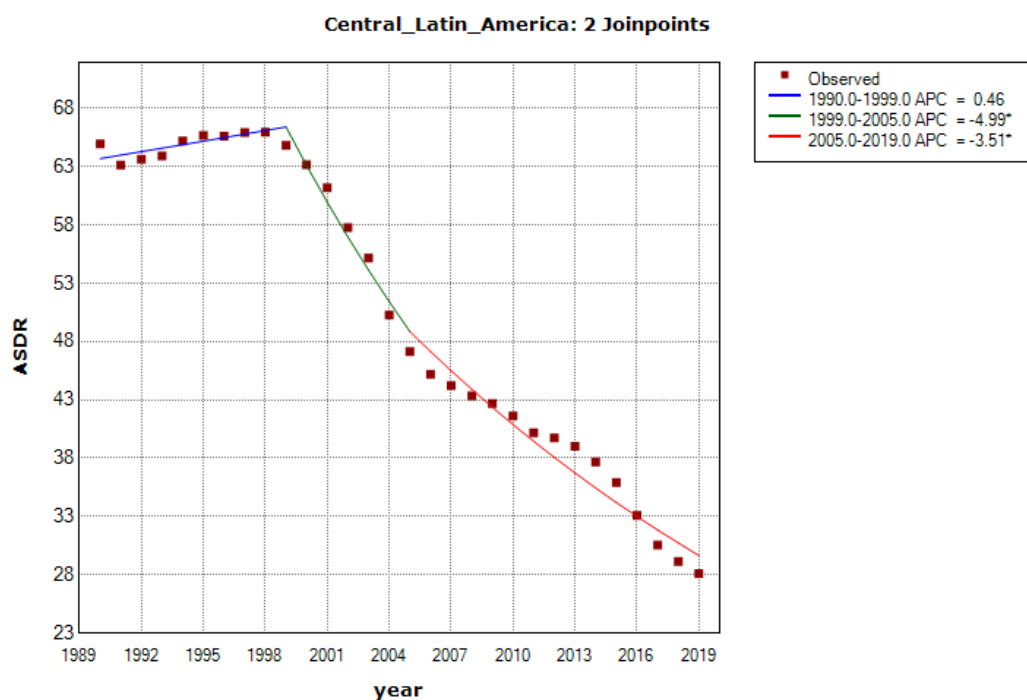

**Figure S27** Trends in the age-standardized disability-adjusted life rate (ASDR, per 100,000 population) of PM<sub>2.5</sub>-related preterm birth in Central Latin America from 1990 to 2019. \* $P < 0.05$

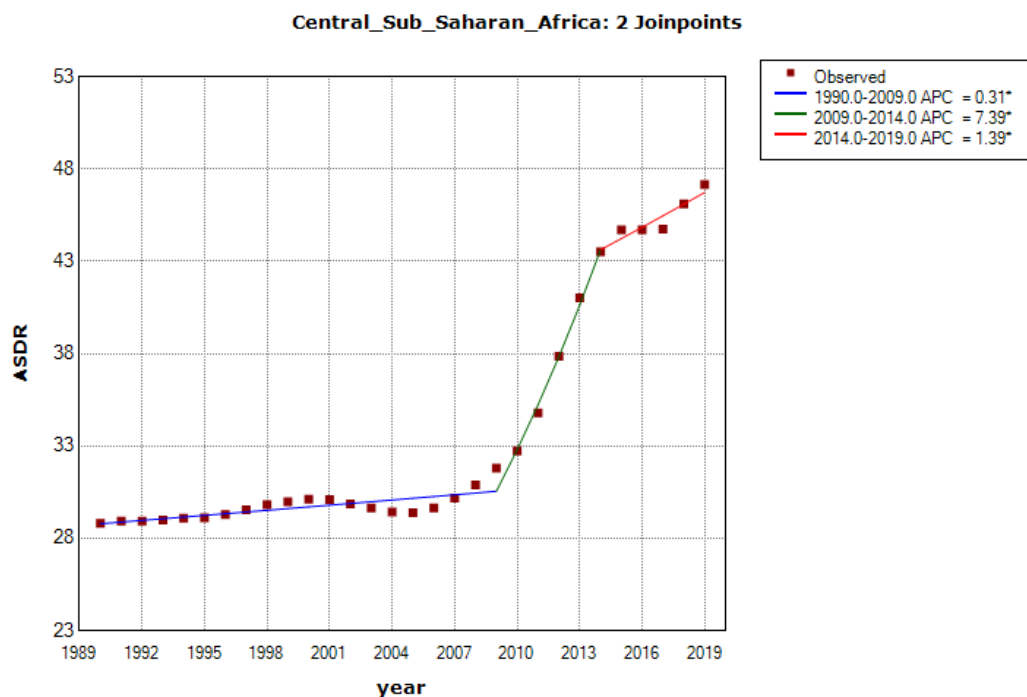

**Figure S28** Trends in the age-standardized disability-adjusted life rate (ASDR, per 100,000 population) of PM<sub>2.5</sub>-related preterm birth in Central Sub Saharan Africa from 1990 to 2019. \* $P < 0.05$

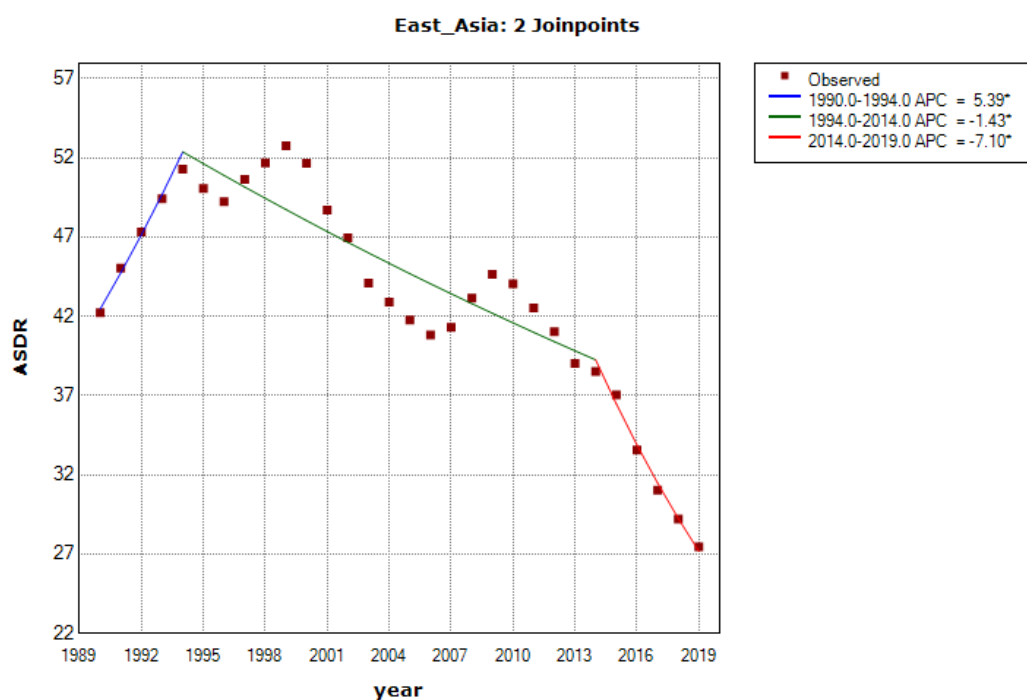

**Figure S29** Trends in the age-standardized disability-adjusted life rate (ASDR, per 100,000 population) of PM<sub>2.5</sub>-related preterm birth in East Asia from 1990 to 2019. \* $P < 0.05$

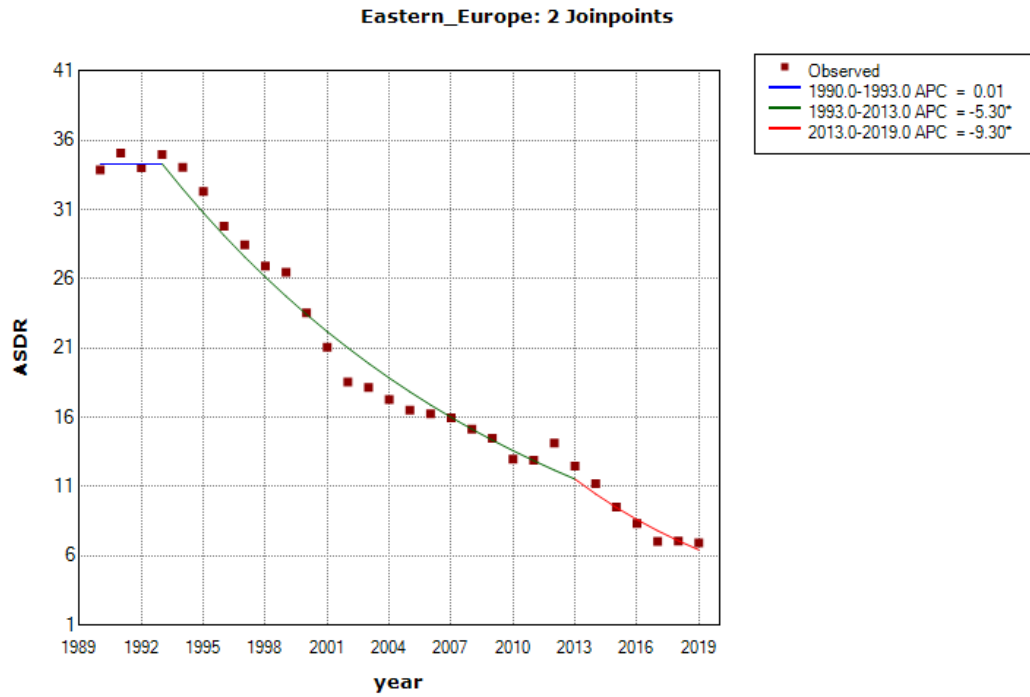

**Figure S30** Trends in the age-standardized disability-adjusted life rate (ASDR, per 100,000 population) of PM<sub>2.5</sub>-related preterm birth in Eastern Europe from 1990 to 2019. \* $P<0.05$

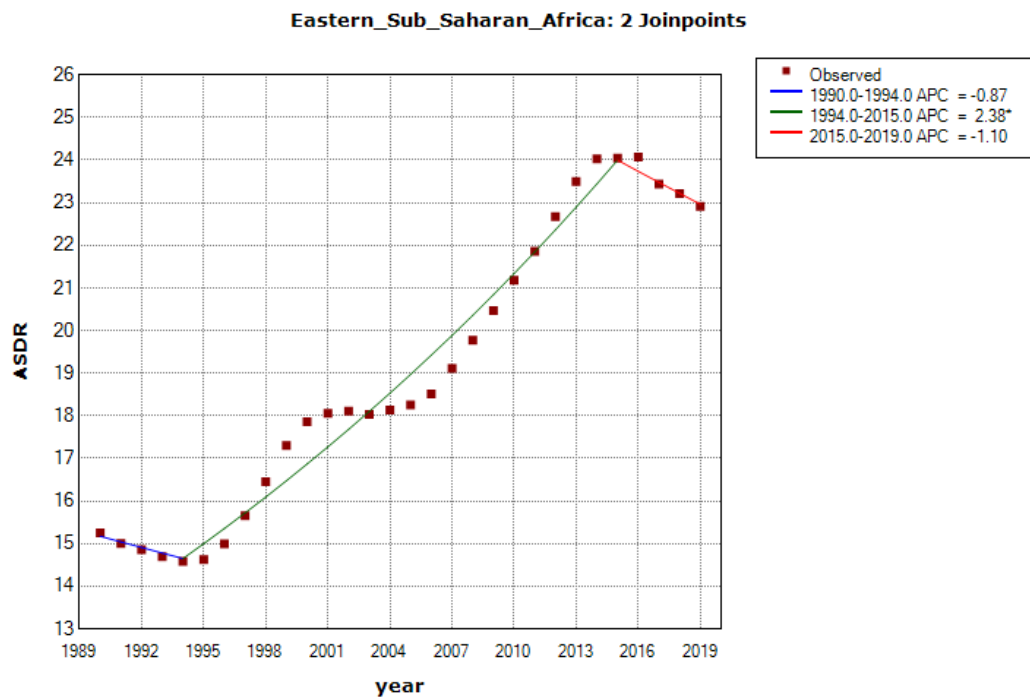

**Figure S31** Trends in the age-standardized disability-adjusted life rate (ASDR, per 100,000 population) of PM<sub>2.5</sub>-related preterm birth in Eastern Sub Saharan Africa from 1990 to 2019. \* $P<0.05$



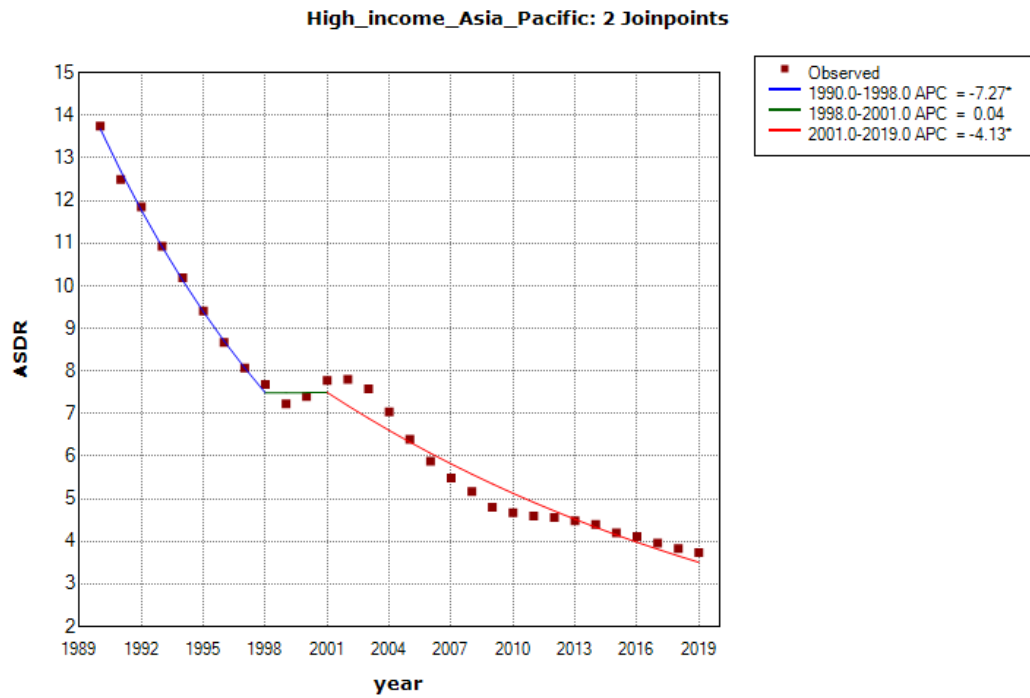

**Figure S32** Trends in the age-standardized disability-adjusted life rate (ASDR, per 100,000 population) of PM<sub>2.5</sub>-related preterm birth in High income Asia Pacific from 1990 to 2019. \* $P < 0.05$

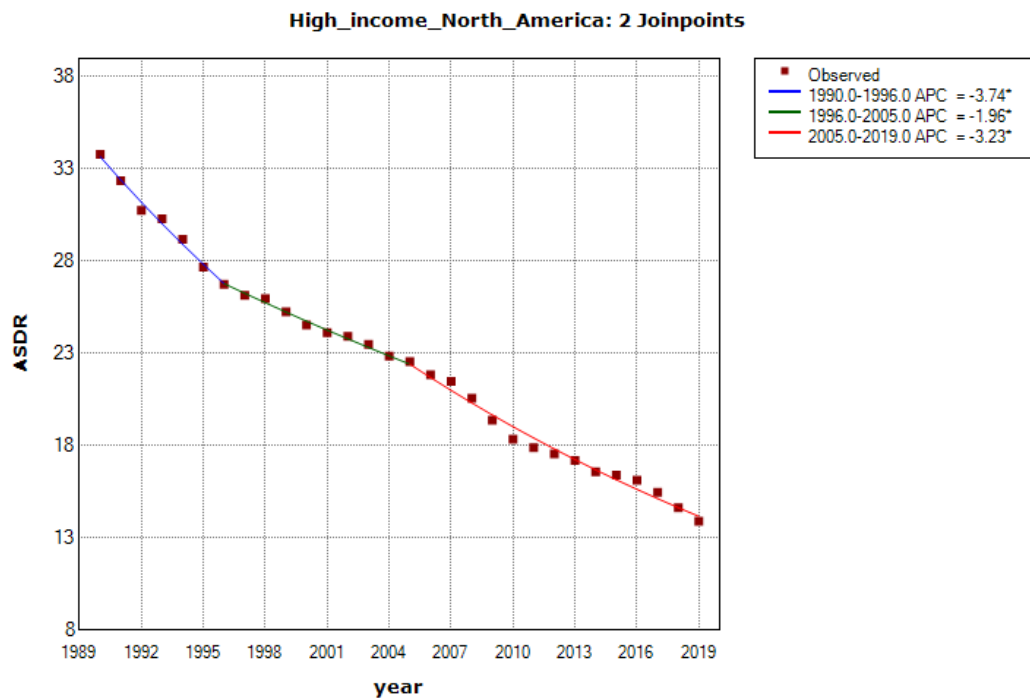

**Figure S33** Trends in the age-standardized disability-adjusted life rate (ASDR, per 100,000 population) of PM<sub>2.5</sub>-related preterm birth in High income North America from 1990 to 2019. \* $P < 0.05$

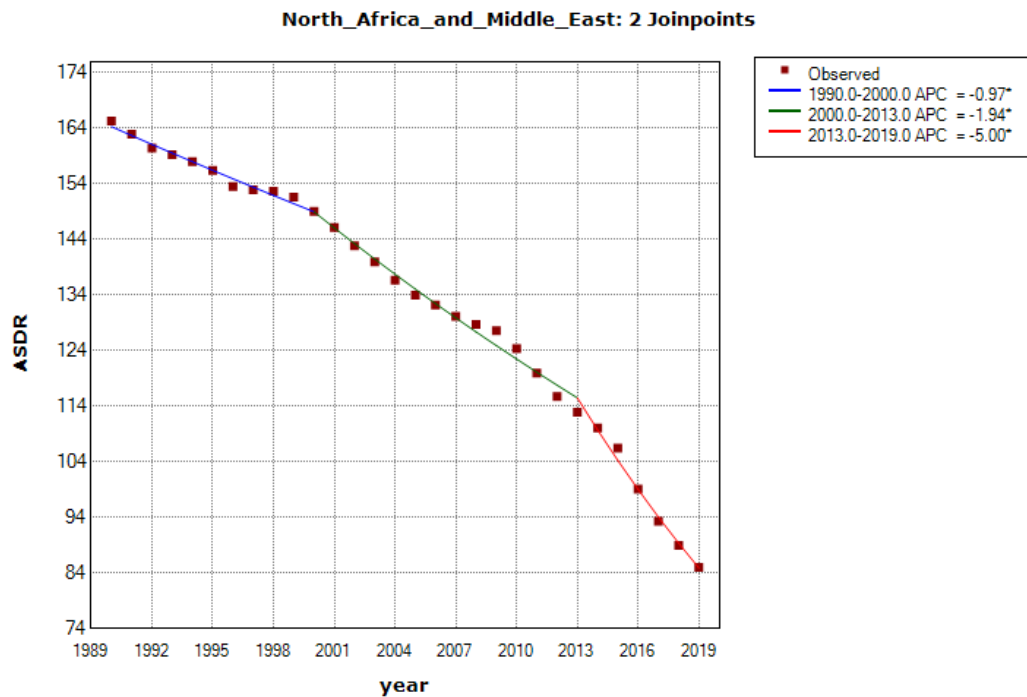

**Figure S34** Trends in the age-standardized disability-adjusted life rate (ASDR, per 100,000 population) of PM<sub>2.5</sub>-related preterm birth in North Africa and Middle East from 1990 to 2019. \* $P < 0.05$

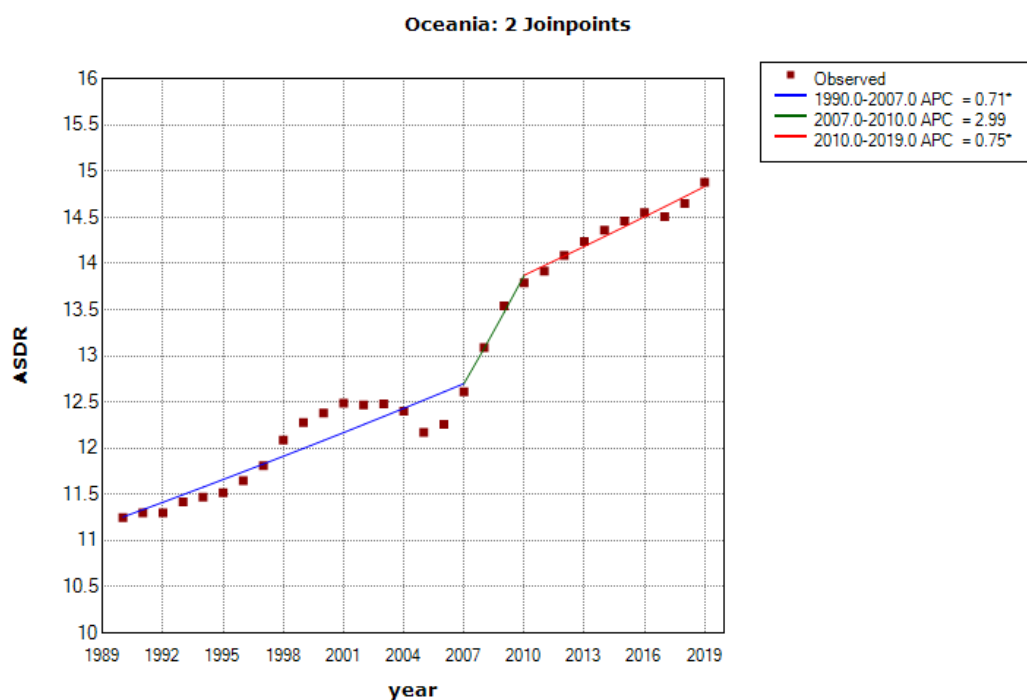

**Figure S35** Trends in the age-standardized disability-adjusted life rate (ASDR, per 100,000 population) of PM<sub>2.5</sub>-related preterm birth in Oceania from 1990 to 2019. \* $P < 0.05$

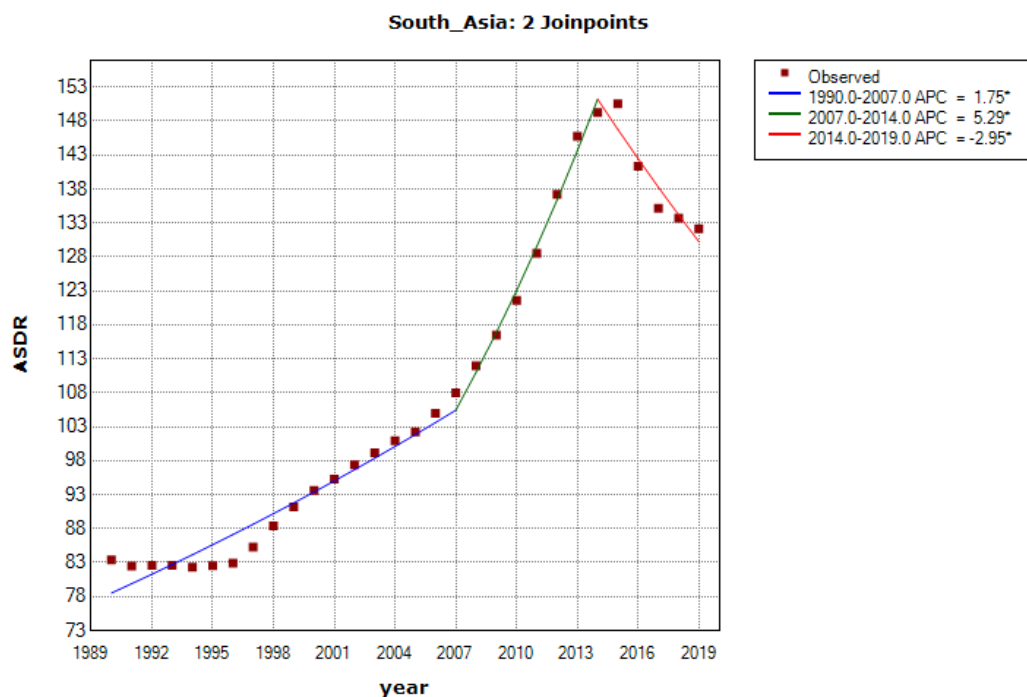

**Figure S36** Trends in the age-standardized disability-adjusted life rate (ASDR, per 100,000 population) of PM<sub>2.5</sub>-related preterm birth in South Asia from 1990 to 2019. \* $P < 0.05$

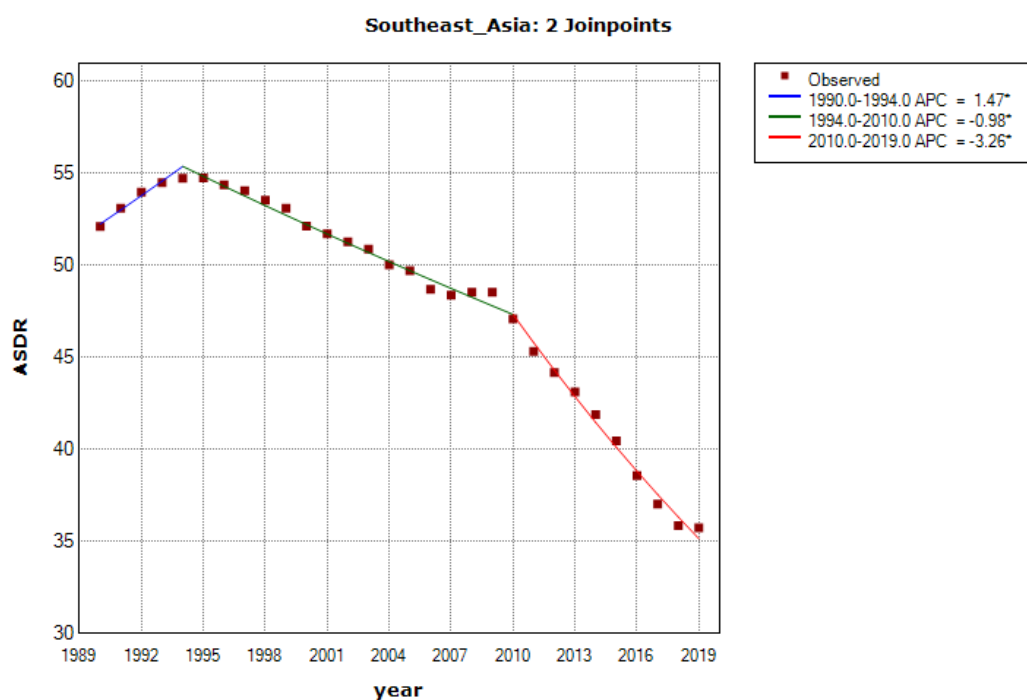

**Figure S37** Trends in the age-standardized disability-adjusted life rate (ASDR, per 100,000 population) of PM<sub>2.5</sub>-related preterm birth in Southeast Asia from 1990 to 2019. \* $P < 0.05$

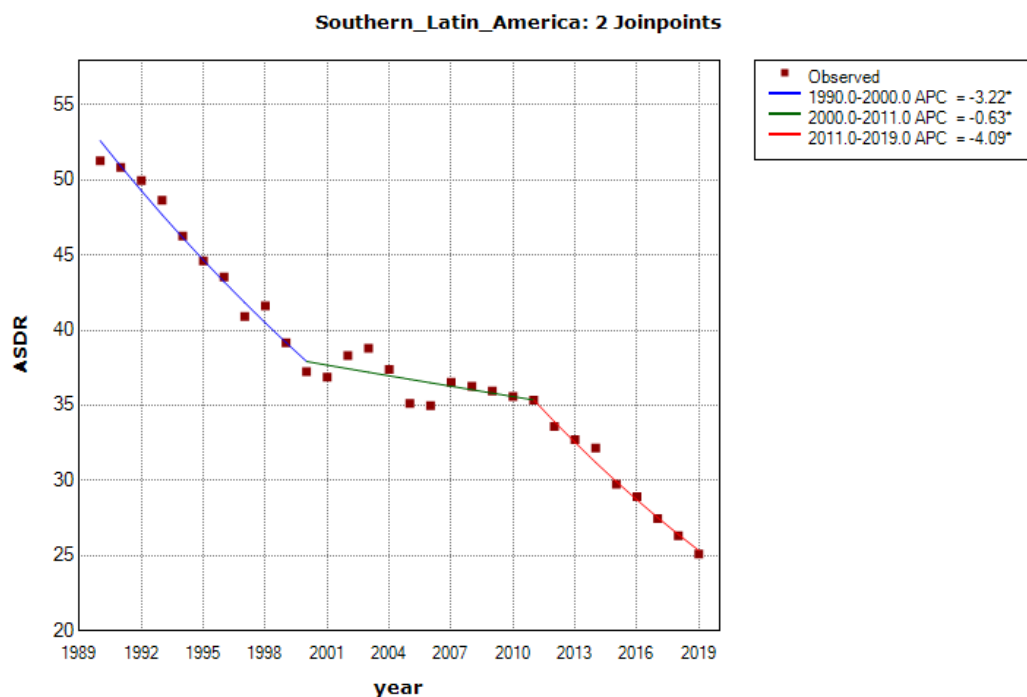

**Figure S38** Trends in the age-standardized disability-adjusted life rate (ASDR, per 100,000 population) of PM<sub>2.5</sub>-related preterm birth in Southern Latin America from 1990 to 2019. \* $P < 0.05$

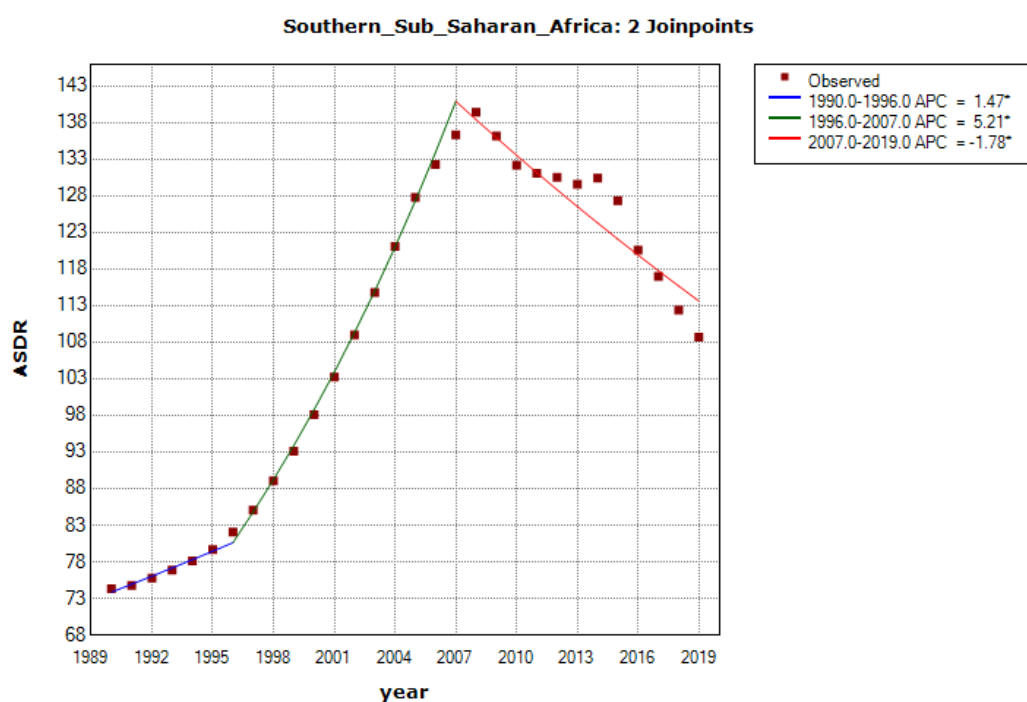

**Figure S39** Trends in the age-standardized disability-adjusted life rate (ASDR, per 100,000 population) of PM<sub>2.5</sub>-related preterm birth in Southern Sub Saharan Africa from 1990 to 2019. \* $P < 0.05$

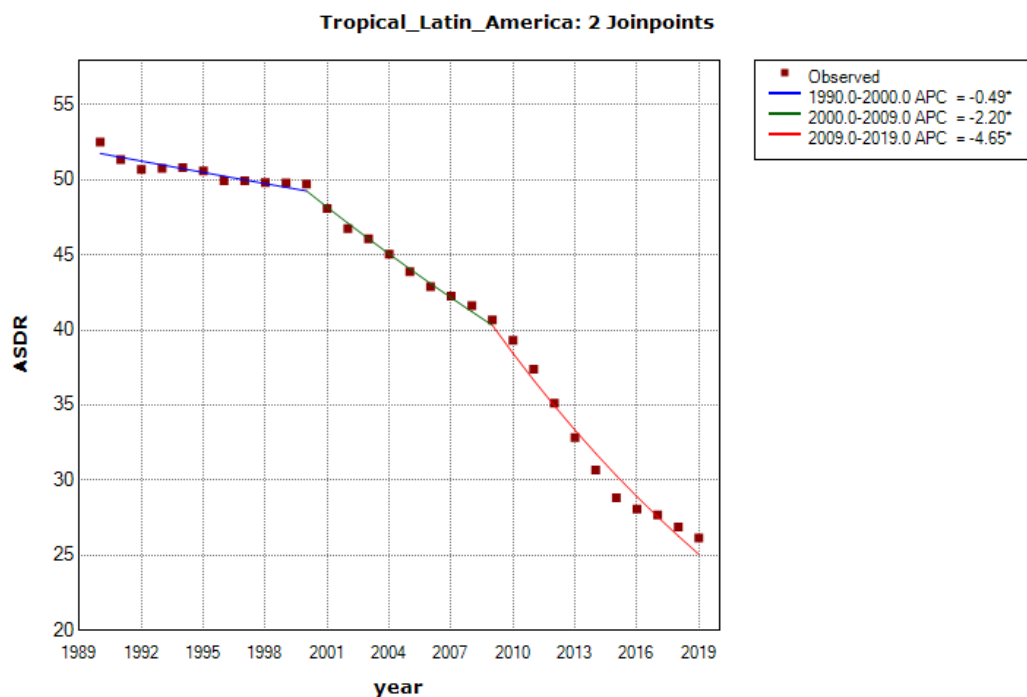

**Figure S40** Trends in the age-standardized disability-adjusted life rate (ASDR, per 100,000 population) of PM<sub>2.5</sub>-related preterm birth in Tropical Latin America from 1990 to 2019. \* $P < 0.05$

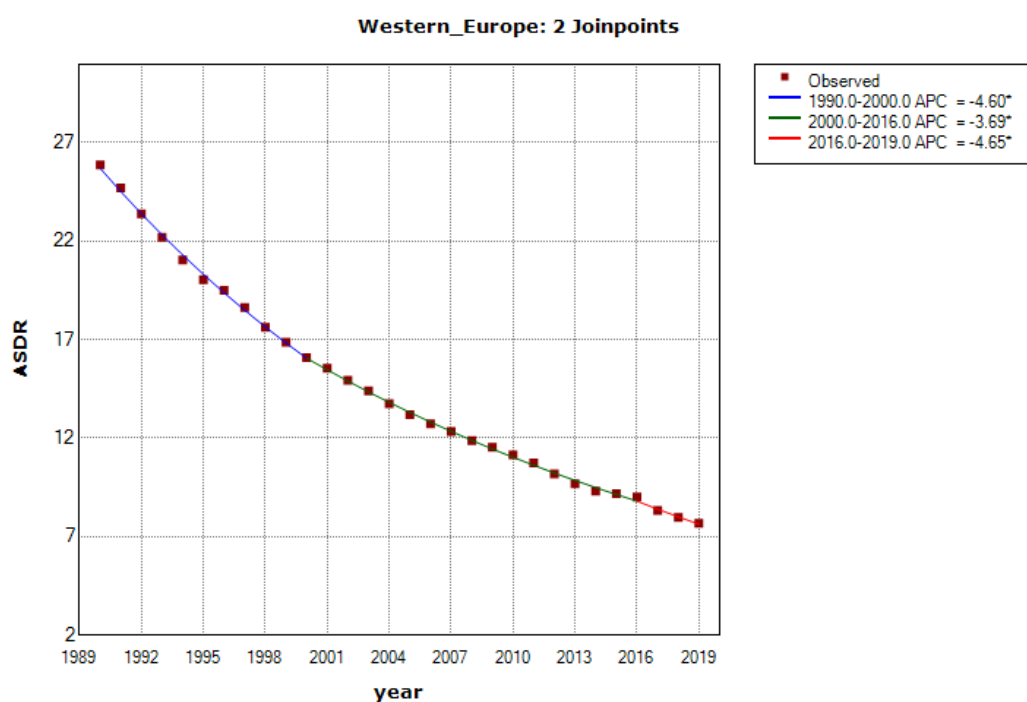

**Figure S41** Trends in the age-standardized disability-adjusted life rate (ASDR, per 100,000 population) of PM<sub>2.5</sub>-related preterm birth in Western Europe from 1990 to 2019. \* $P < 0.05$

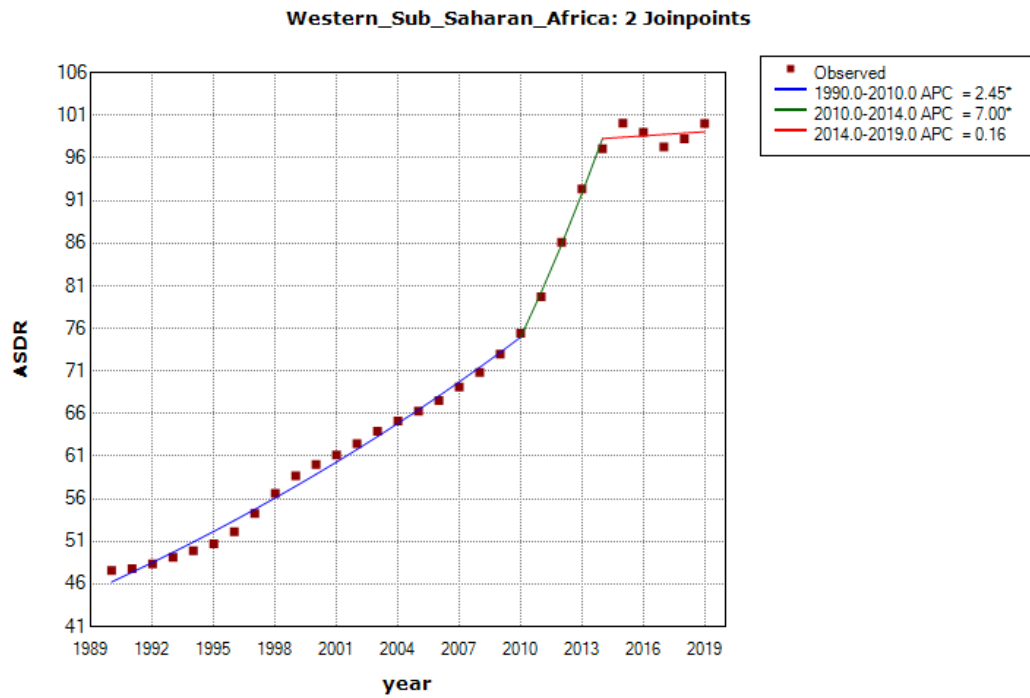

**Figure S42** Trends in the age-standardized disability-adjusted life rate (ASDR, per 100,000 population) of PM<sub>2.5</sub>-related preterm birth in Western Sub Saharan Africa from 1990 to 2019. \* $P < 0.05$
